# Supplementary material for: CD40 Is Essential in the Upregulation of TRAF Proteins and NF-KappaB-Dependent Proinflammatory Gene Expression after Arterial Injury
Source: PubMed Central journal article supplement (PMC3158063; doi:10.1371/journal.pone.0023239), 2011-08-18
Supplement: pone.0023239.s001.pdf [file pone.0023239.s001.pdf]

**Figure S1.** Endothelial removal was confirmed by in vivo Evans blue staining

**A. Femoral Artery**

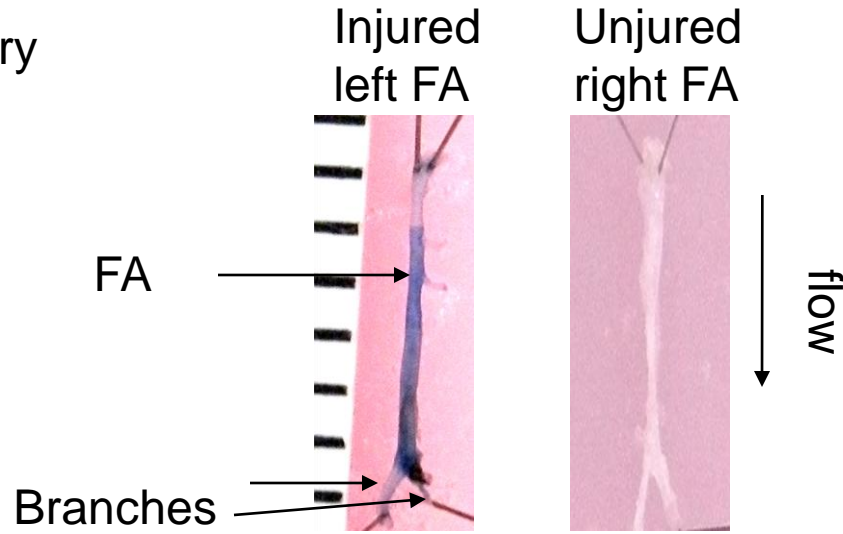

**B. Carotid Artery**

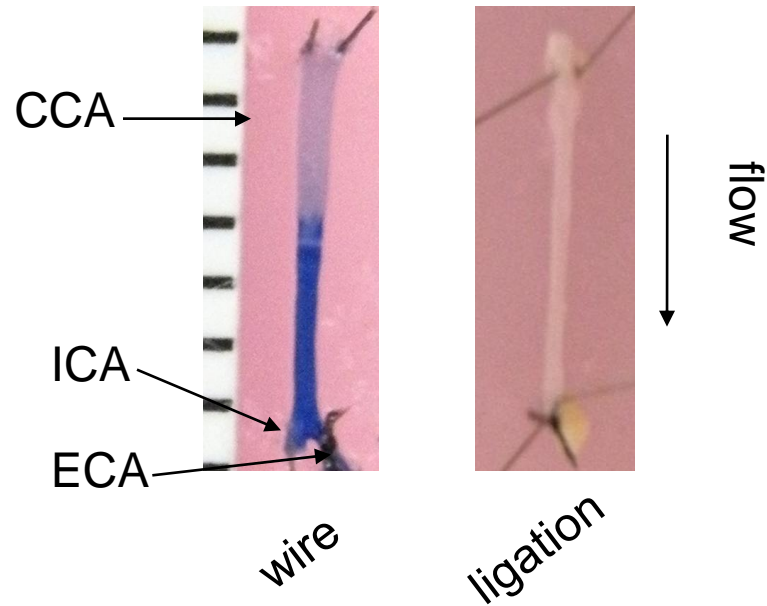

**Fig. S1.**
