# Supplementary material for: CD40 Is Essential in the Upregulation of TRAF Proteins and NF-KappaB-Dependent Proinflammatory Gene Expression after Arterial Injury
Source: PubMed Central journal article supplement (PMC3158063; doi:10.1371/journal.pone.0023239), 2011-08-18
Supplement: pone.0023239.s002.pdf [file pone.0023239.s002.pdf]

**Figure S2.** CD40 deficiency inhibits TRAFs expression in the vessel wall after carotid ligation

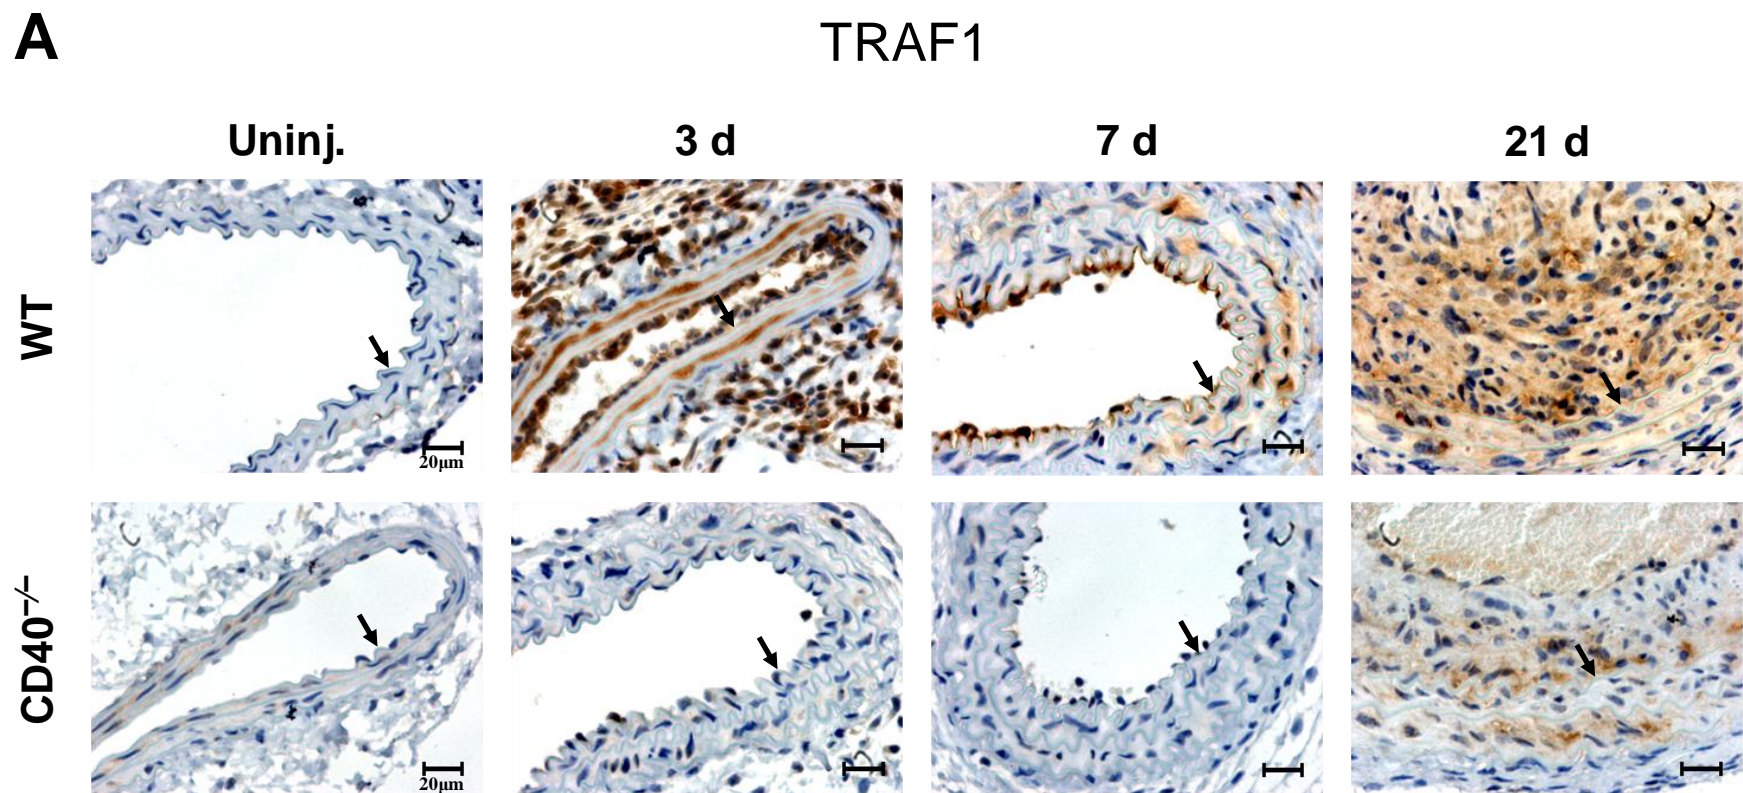

**Fig. S2**

**B**

TRAF2

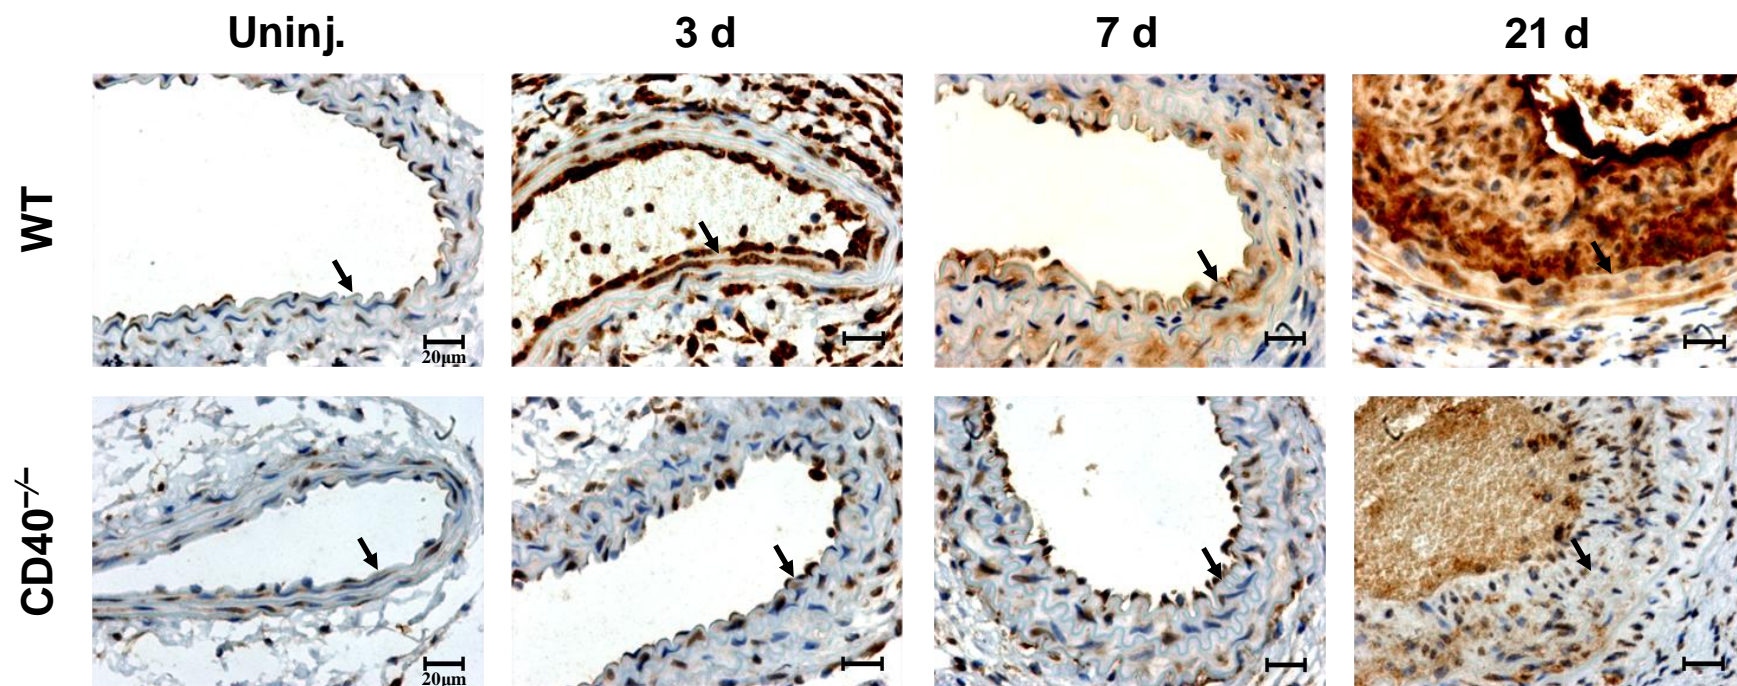

**Fig. S2**

**C**

**TRAF3**

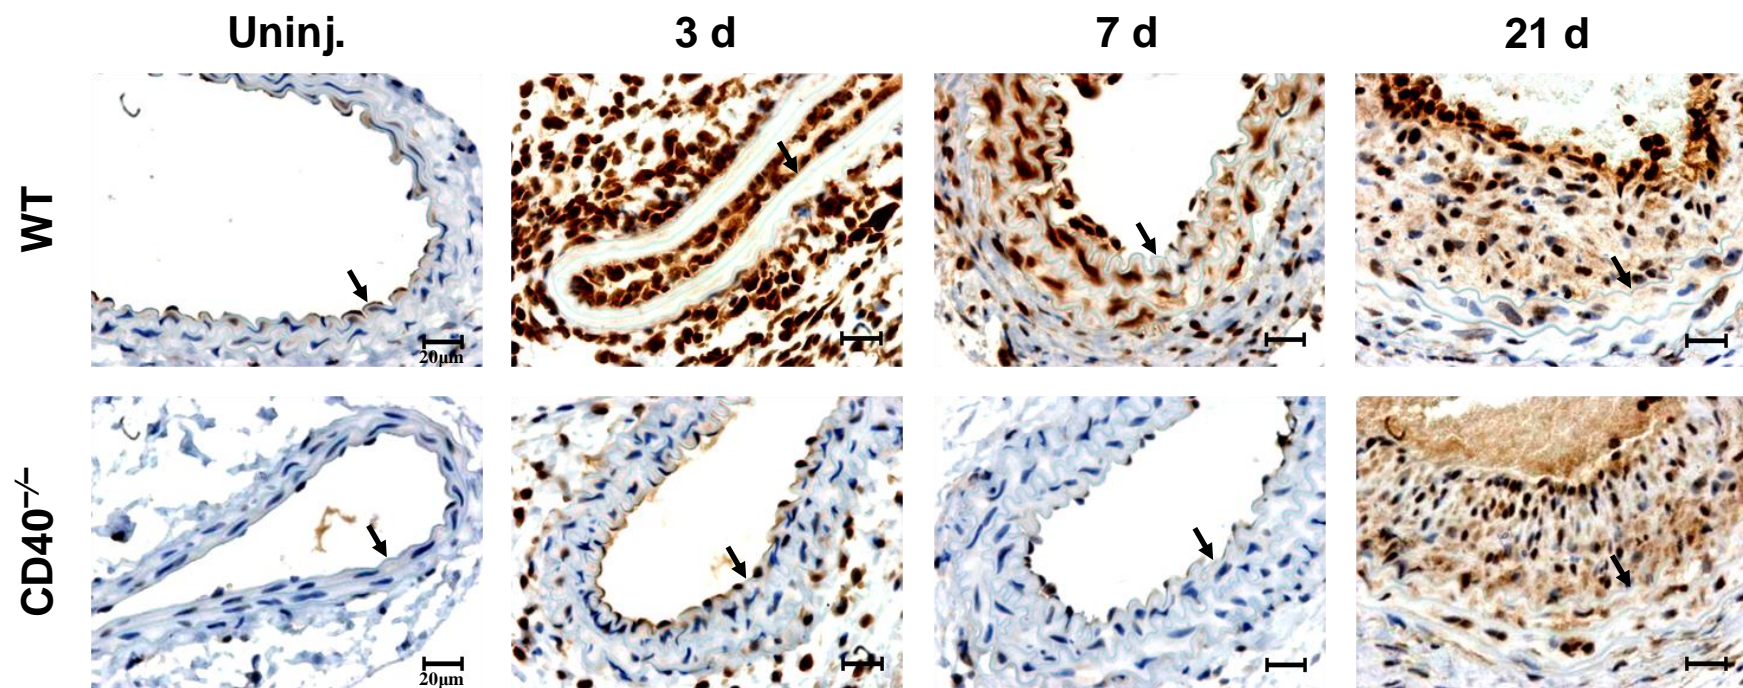

**Fig. S2**

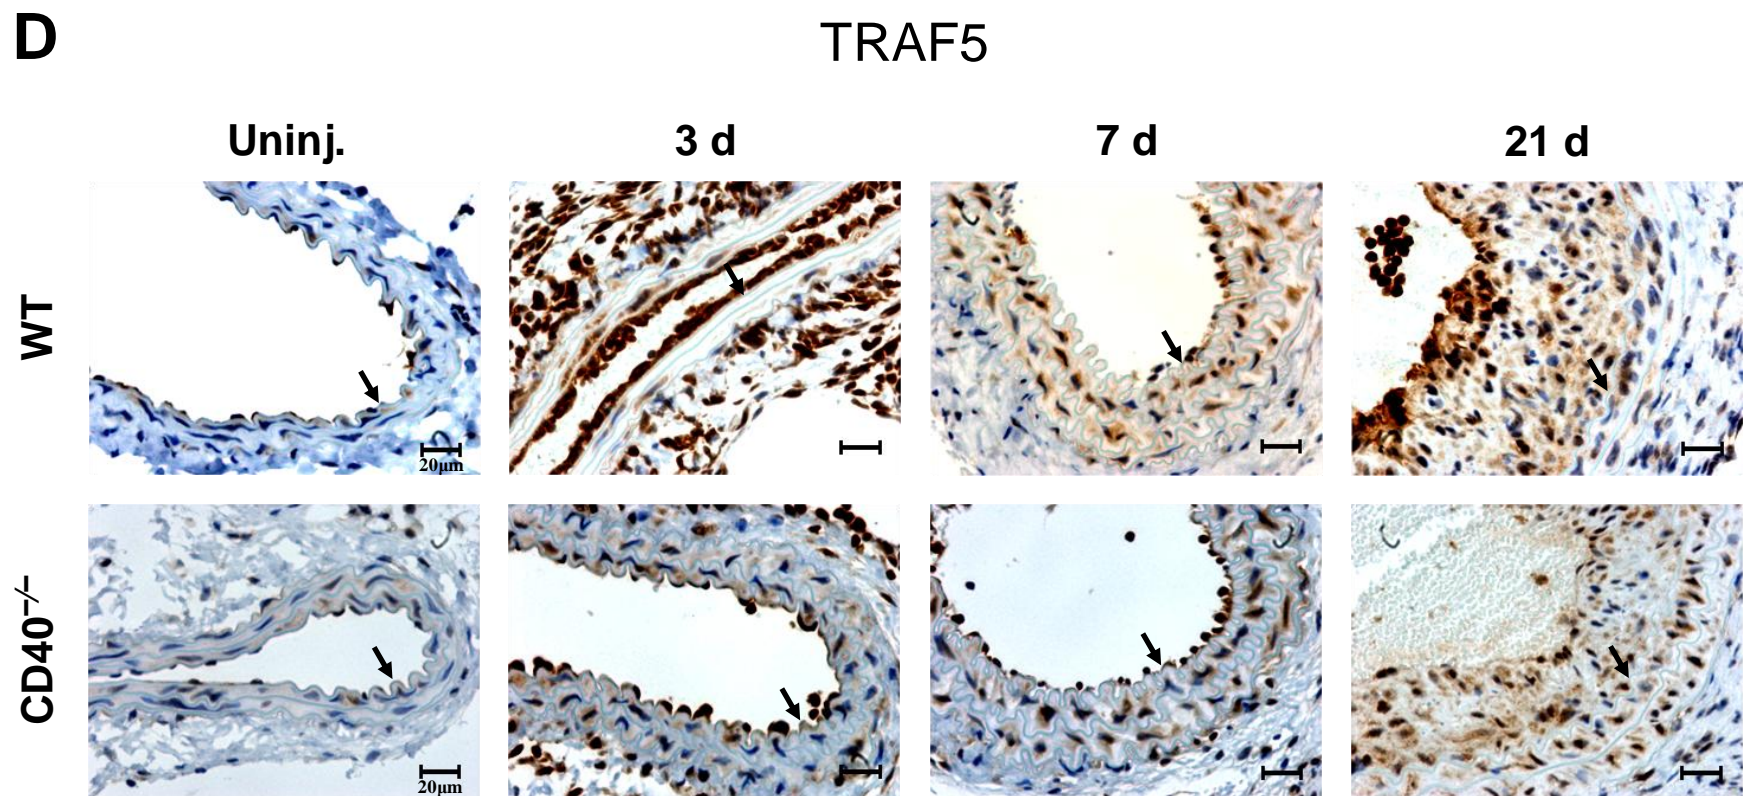

**Fig. S2**
