# Supplementary material for: CD40 Is Essential in the Upregulation of TRAF Proteins and NF-KappaB-Dependent Proinflammatory Gene Expression after Arterial Injury
Source: PubMed Central journal article supplement (PMC3158063; doi:10.1371/journal.pone.0023239), 2011-08-18
Supplement: pone.0023239.s003.pdf [file pone.0023239.s003.pdf]

**Figure S3.** *Decreased neointimal formation and lumen stenosis after carotid artery ligation in CD40<sup>-/-</sup> mice*

**A****Carotid Artery Ligation**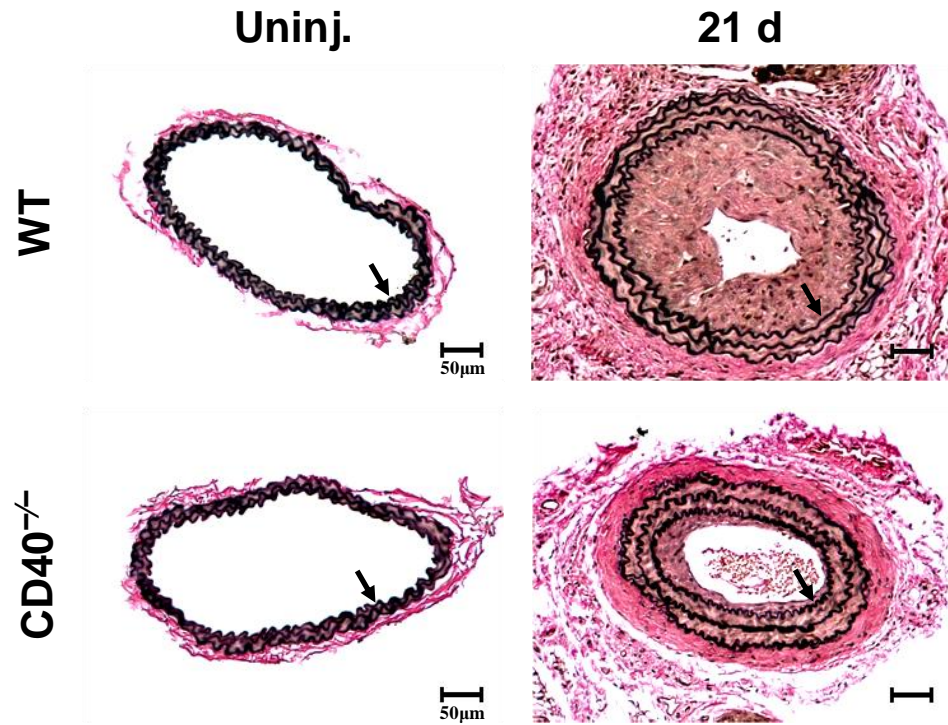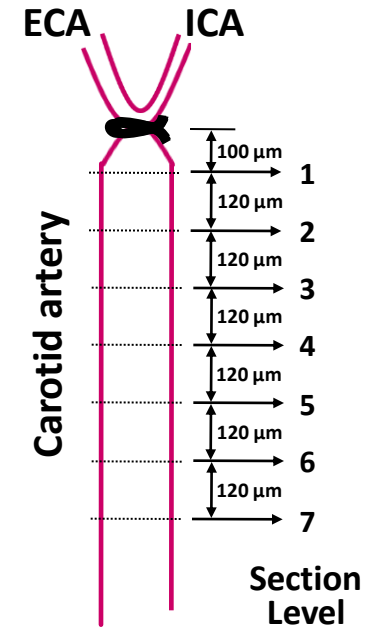**Fig. S3**

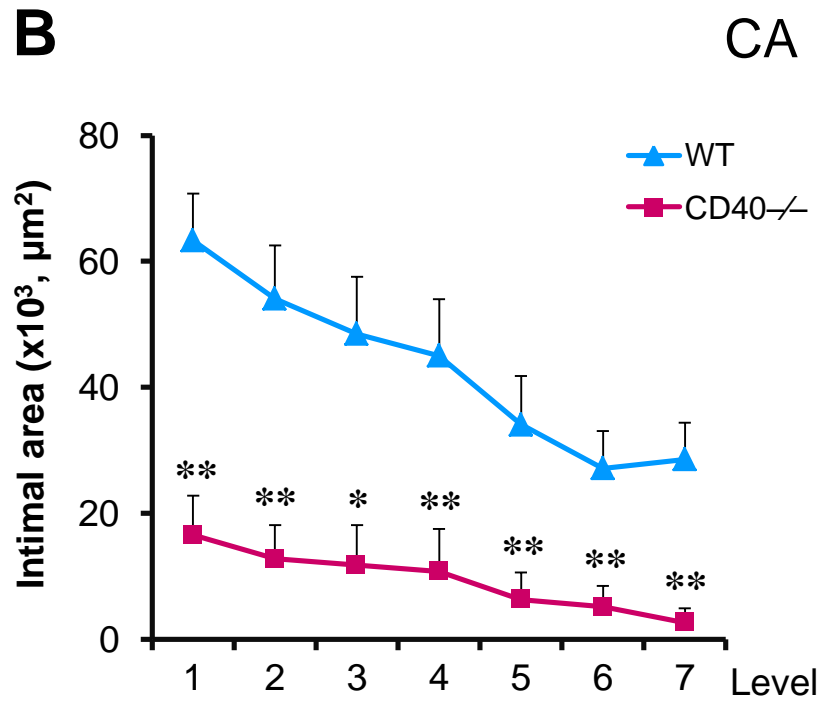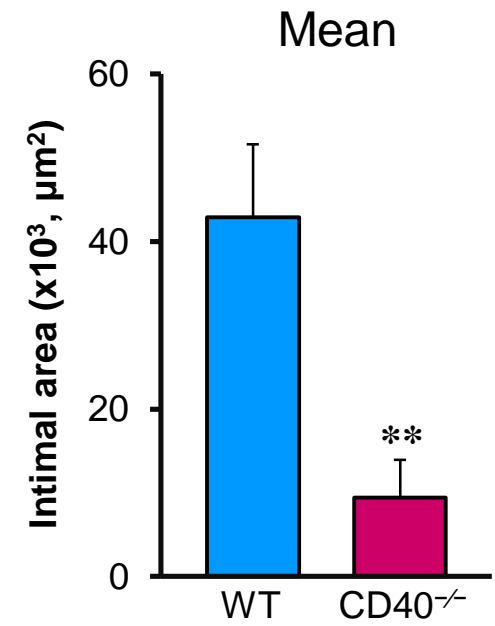

**Fig.S3**

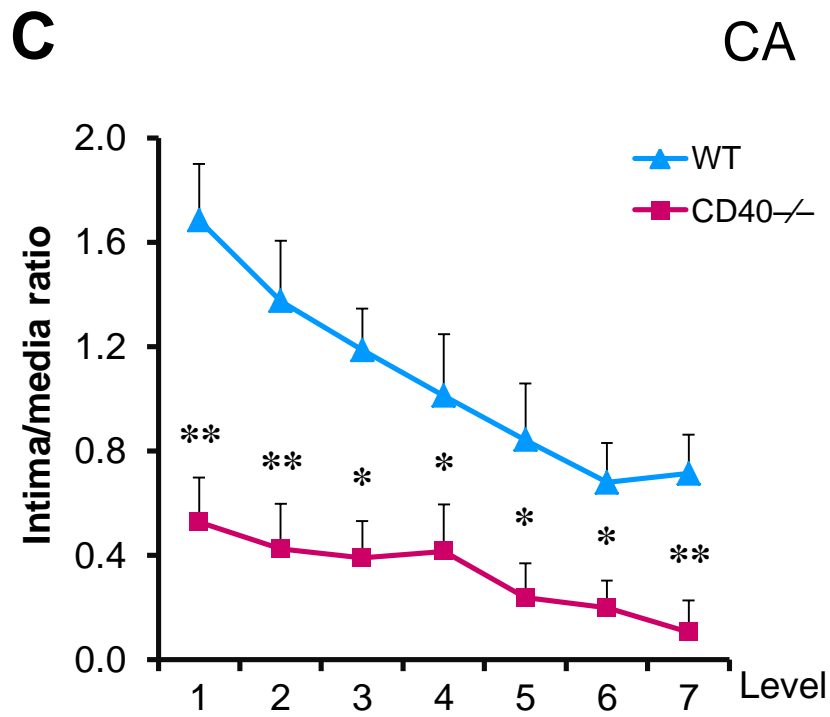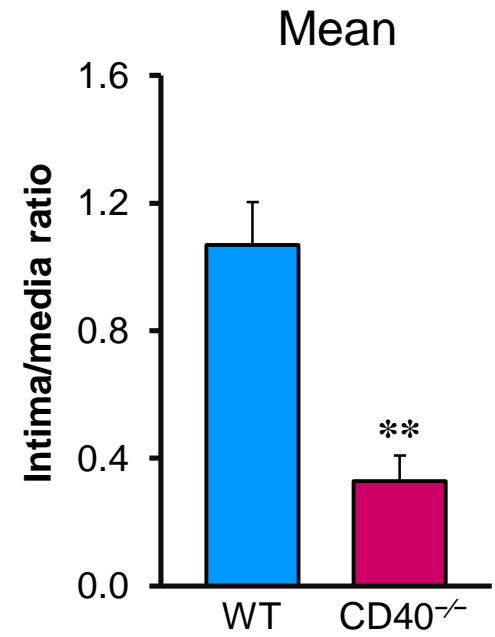

**Fig. S3**

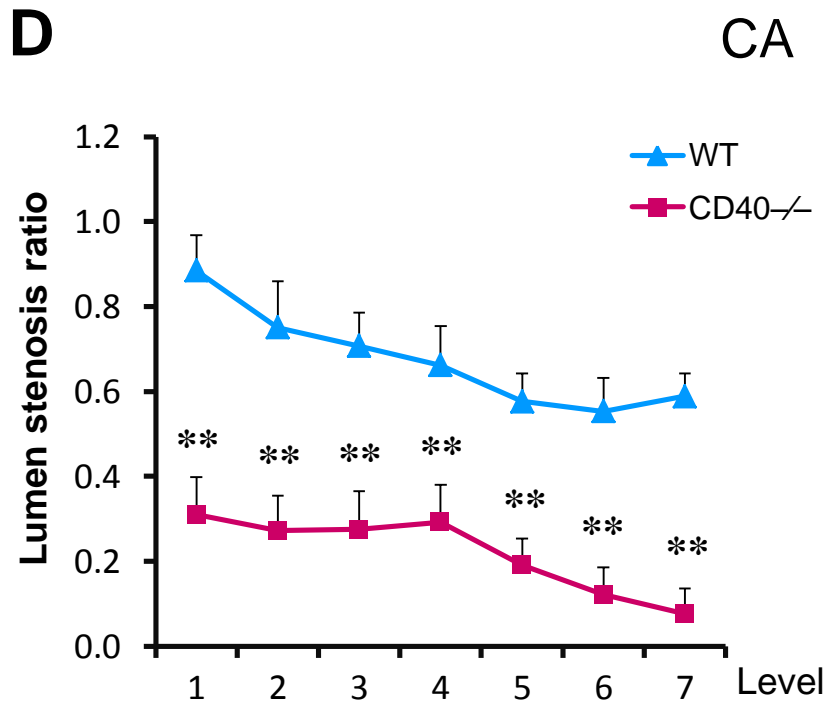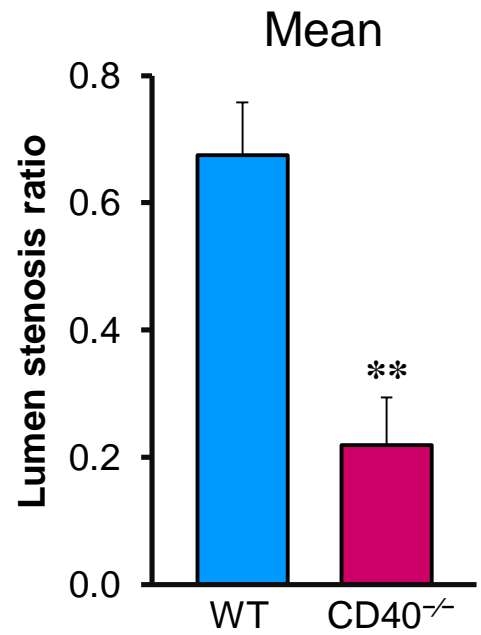

**Fig. S3**
