# Supplementary material for: CD40 Is Essential in the Upregulation of TRAF Proteins and NF-KappaB-Dependent Proinflammatory Gene Expression after Arterial Injury
Source: PubMed Central journal article supplement (PMC3158063; doi:10.1371/journal.pone.0023239), 2011-08-18
Supplement: pone.0023239.s004.pdf [file pone.0023239.s004.pdf]

**Figure S4.** The impact of CD40 deficiency on vascular remodeling after vascular injury

**A**

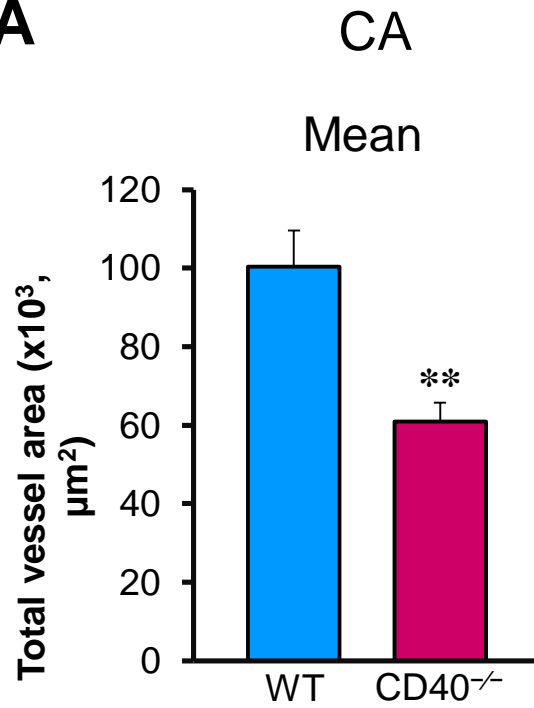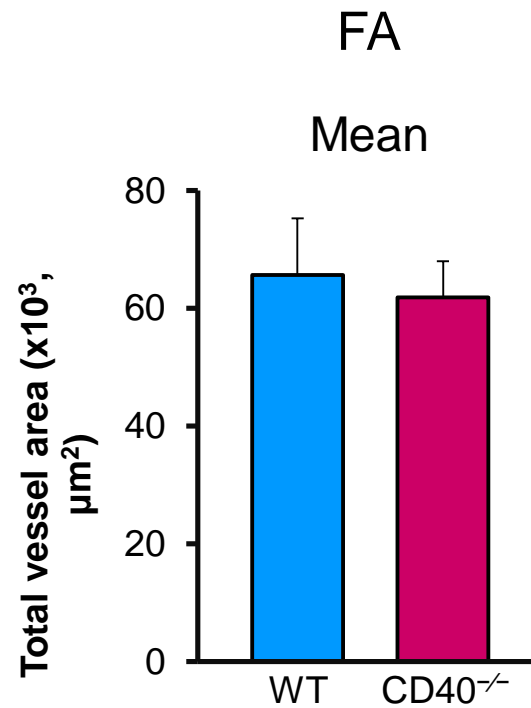

**Fig. S4**

**B**

Uninjured CA

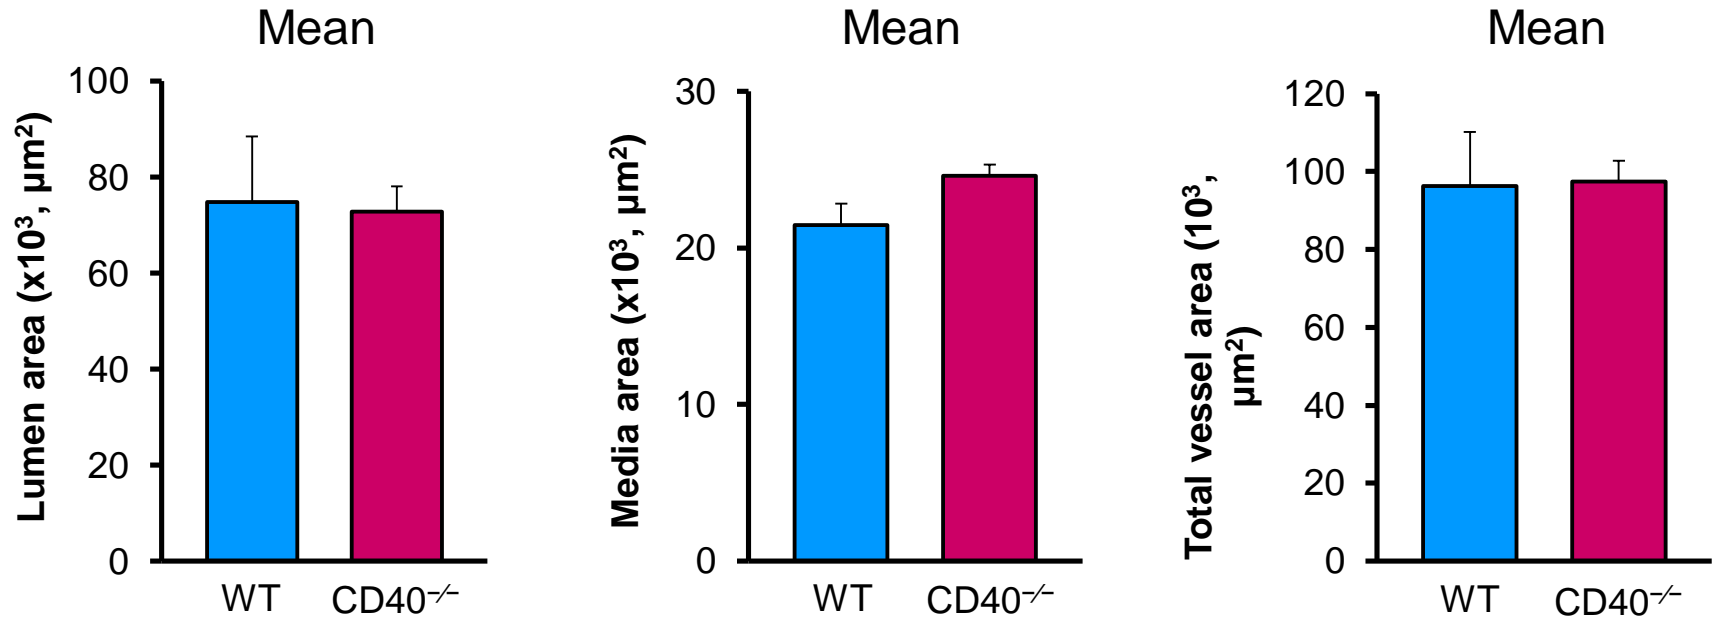

**Fig. S4**

**C**

Uninjured FA

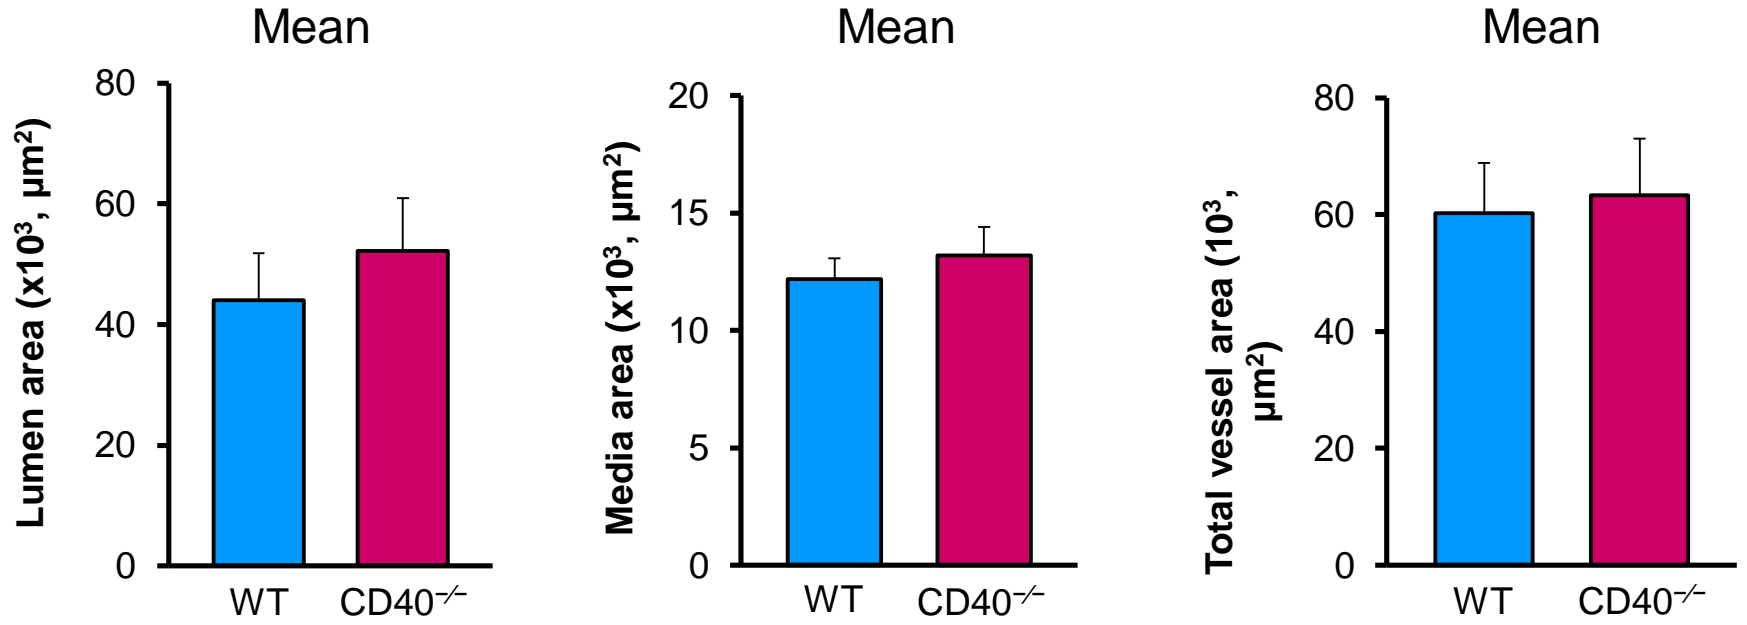

**Fig. S4**
