# Supplementary material for: CD40 Is Essential in the Upregulation of TRAF Proteins and NF-KappaB-Dependent Proinflammatory Gene Expression after Arterial Injury
Source: PubMed Central journal article supplement (PMC3158063; doi:10.1371/journal.pone.0023239), 2011-08-18
Supplement: pone.0023239.s005.pdf [file pone.0023239.s005.pdf]

## Figure S5. Plasma MCP-1 and soluble ICAM-1 in CD40<sup>-/-</sup> mice and WT controls

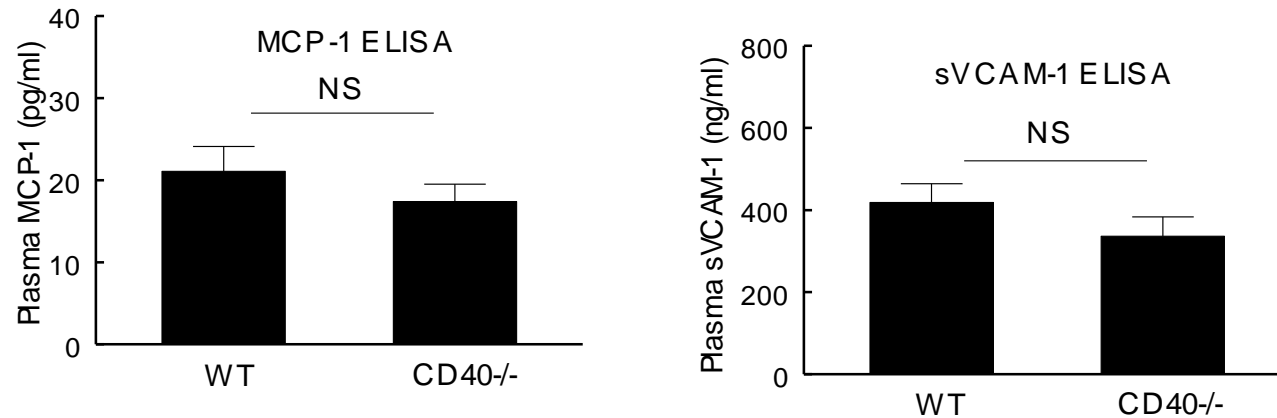

Fig. S5
