# Supplementary material for: CD40 Is Essential in the Upregulation of TRAF Proteins and NF-KappaB-Dependent Proinflammatory Gene Expression after Arterial Injury
Source: PubMed Central journal article supplement (PMC3158063; doi:10.1371/journal.pone.0023239), 2011-08-18
Supplement: pone.0023239.s006.pdf [file pone.0023239.s006.pdf]

**Table S1. Complete blood cell counts (1000/ $\mu$ L)**

| Mice                | White blood cell | Granulocytes    | Lymphocytes     | Monocytes       | Platelets     |
|---------------------|------------------|-----------------|-----------------|-----------------|---------------|
| C57Bl6              | 4.72 $\pm$ 0.43  | 2.46 $\pm$ 0.28 | 1.67 $\pm$ 0.19 | 0.28 $\pm$ 0.12 | 745 $\pm$ 98  |
| CD40 <sup>-/-</sup> | 4.65 $\pm$ 0.45  | 2.37 $\pm$ 0.26 | 1.63 $\pm$ 0.18 | 0.27 $\pm$ 0.13 | 821 $\pm$ 101 |

Peripheral blood was collected from the retro-orbital plexus of mice anesthetized with isoflurane, using heparinized microhematocrit capillary tubes. Complete blood counts were performed using an automated veterinary hematology analyzer (VetABC, Scil Veterinary Diagnostics).
