# Supplementary material for: CD40 Is Essential in the Upregulation of TRAF Proteins and NF-KappaB-Dependent Proinflammatory Gene Expression after Arterial Injury
Source: PubMed Central journal article supplement (PMC3158063; doi:10.1371/journal.pone.0023239), 2011-08-18
Supplement: pone.0023239.s007.pdf [file pone.0023239.s007.pdf]

**Table S2. Primer sequences for quantitative RT-PCR**

| <b>Primer</b>                  | <b>Primer sequence</b>                                            | <b>PCR product size</b> |
|--------------------------------|-------------------------------------------------------------------|-------------------------|
| <b>CD40</b>                    | F: 5'-CACTGATACCGTCTGTCATCCCT-3'<br>R: 5'-ATGACCAGCAGGGCTCGCAT-3' | [180 bp]                |
| <b>ICAM-1</b>                  | F: 5'-CCTGCCTAAGGAAGACATGA-3'<br>R: 5'-CCCAGACTCTCACAGCATCT-3'    | [222 bp]                |
| <b>VCAM-1</b>                  | F: 5'-CCCAAACAGAGGCAGAGTGT-3'<br>R: 5'-CAGGATTTTGGGAGCTGGTA-3'    | [150 bp]                |
| <b>MCP-1</b>                   | F: 5'-GAAGGAATGGGTCCAGACAT-3'<br>R: 5'-ACGGGTCAACTTCACATTCA-3'    | [127 bp]                |
| <b>TNF-<math>\alpha</math></b> | F: 5'-CCCCTCTGACCCCTTTACT-3'<br>R: 5'-TTTGAGTCCTTGATGGTGGT-3'     | [201 bp]                |
| <b>IL-6</b>                    | F: 5'-CTACCCCAATTTCCAATGCT-3'<br>R: 5'-ACCACAGTGAGGAATGTCCA-3'    | [187 bp]                |
| <b>IL-1<math>\beta</math></b>  | F: 5'-CCCAACTGGTACATCAGCAC-3'<br>R: 5'-TCTGCTCATTACGAAAAGG-3'     | [180 bp]                |
| <b>GAPDH</b>                   | F: 5'-CTGGAGAAACCTGCCAAGTA-3'<br>R: 5'-TGTTGCTGTAGCCGTATTCA-3'    | [223 bp]                |
